# Supplementary material for: In Silico Study of piRNA Interactions with the SARS-CoV-2 Genome
Source: MDPI journal article supplement (doi:10.3390/ijms23179919), 2022-08-31
Supplement: s1 [file s1]

Figure S1. The schemes of spiRNA interaction with full complementarity in clusters of BSs in CDS  
gRNA SARS-CoV-2 from 12077 nt to 12107 nt

spiRNA; BS, nt; Region;  $\Delta G$ , kJ/mol;  $\Delta G/\Delta G_m$ , %; piRNA length, nt

spiR-180819; 12080; CDS; -125; 100; 24

5' -GCAACCUUACAAGCUAUAGCCUCA-3'

|||||

3' -CGUUGGAAUGUUCGAUAUCGGAGU-5'

spiR-184604; 12080; CDS; -125; 100; 24

5' -GCAACCUUACAAGCUAUAGCCUCA-3'

|||||

3' -CGUUGGAAUGUUCGAUAUCGGAGU-5'

spiR-187101; 2079; CDS; -132; 100; 25

5' -GGCAACCUUACAAGCUAUAGCCUCA-3'

|||||

3' -CCGUUGGAAUGUUCGAUAUCGGAGU-5'

spiR-188123; 12078; CDS; -138; 100; 26

5' -GGGCAACCUUACAAGCUAUAGCCUCA-3'

|||||

3' -CCCGUUGGAAUGUUCGAUAUCGGAGU-5'

spiR-188808; 12078; CDS; -138; 100; 26

5' -GGGCAACCUUACAAGCUAUAGCCUCA-3'

|||||

3' -CCCGUUGGAAUGUUCGAUAUCGGAGU-5'

spiR-188962; 12078; CDS; -138; 100; 26

5' -GGGCAACCUUACAAGCUAUAGCCUCA-3'

|||||

3' -CCCGUUGGAAUGUUCGAUAUCGGAGU-5'

spiR-189493; 12079; CDS; -132; 100; 25

5' -GGCAACCUUACAAGCUAUAGCCUCA-3'

|||||

3' -CCGUUGGAAUGUUCGAUAUCGGAGU-5'

spiR-189542; 12078; CDS; -138; 100; 26

5' -GGGCAACCUUACAAGCUAUAGCCUCA-3'

|||||

3' -CCCGUUGGAAUGUUCGAUAUCGGAGU-5'

spiR-189637; 12078; CDS; -138; 100; 26

5' -GGGCAACCUUACAAGCUAUAGCCUCA-3'

|||||

3' -CCCGUUGGAAUGUUCGAUAUCGGAGU-5'

spiR-190555; 12078; CDS; -138; 100; 26

5' -GGGCAACCUUACAAGCUAUAGCCUCA-3'

|||||

3' -CCCGUUGGAAUGUUCGAUAUCGGAGU-5'

spiR-190706; 12078; CDS; -138; 100; 26

5' -GGGCAACCUUACAAGCUAUAGCCUCA-3'

|||||

3' -CCCGUUGGAAUGUUCGAUAUCGGAGU-5'

spiR-190719; 12079; CDS; -132; 100; 25

5' -GGCAACCUUACAAGCUAUAGCCUCA-3'

|||||

3' -CCGUUGGAAUGUUCGAUAUCGGAGU-5'

spiR-190772; 12078; CDS; -138; 100; 26

5' -GGGCAACCUUACAAGCUAUAGCCUCA-3'

|||||

3' -CCCGUUGGAAUGUUCGAUAUCGGAGU-5'

spiR-191124; 12079; CDS; -132; 100; 25  
5' -GGCAACCUUACAAGCUAUAGCCUCA-3'  
|||||  
3' -CCGUUGGAAUGUUCGAUAUCGGAGU-5'

spiR-191185; 12079; CDS; -132; 100; 25  
5' -GGCAACCUUACAAGCUAUAGCCUCA-3'  
|||||  
3' -CCGUUGGAAUGUUCGAUAUCGGAGU-5'

spiR-191492; 12079; CDS; -132; 100; 25  
5' -GGCAACCUUACAAGCUAUAGCCUCA-3'  
|||||  
3' -CCGUUGGAAUGUUCGAUAUCGGAGU-5'

spiR-192078; 12079; CDS; -132; 100; 25  
5' -GGCAACCUUACAAGCUAUAGCCUCA-3'  
|||||  
3' -CCGUUGGAAUGUUCGAUAUCGGAGU-5'

spiR-192160; 12078; CDS; -138; 100; 26  
5' -GGGCAACCUUACAAGCUAUAGCCUCA-3'  
|||||  
3' -CCCGUUGGAAUGUUCGAUAUCGGAGU-5'

spiR-194007; 12079; CDS; -132; 100; 25  
5' -GGCAACCUUACAAGCUAUAGCCUCA-3'  
|||||  
3' -CCGUUGGAAUGUUCGAUAUCGGAGU-5'

spiR-194135; 12078; CDS; -138; 100; 26  
5' -GGGCAACCUUACAAGCUAUAGCCUCA-3'  
|||||  
3' -CCCGUUGGAAUGUUCGAUAUCGGAGU-5'

spiR-194172; 12079; CDS; -132; 100; 25  
5' -GGCAACCUUACAAGCUAUAGCCUCA-3'  
|||||  
3' -CCGUUGGAAUGUUCGAUAUCGGAGU-5'

spiR-194397; 12078; CDS; -138; 100; 26  
5' -GGGCAACCUUACAAGCUAUAGCCUCA-3'  
|||||  
3' -CCCGUUGGAAUGUUCGAUAUCGGAGU-5'

spiR-194781; 12079; CDS; -132; 100; 25  
5' -GGCAACCUUACAAGCUAUAGCCUCA-3'  
|||||  
3' -CCGUUGGAAUGUUCGAUAUCGGAGU-5'

spiR-345961; 12084; CDS; -125; 100; 24  
5' -CCUUACAAGCUAUAGCCUCAGAGU-3'  
|||||  
3' -GGAAUGUUCGAUAUCGGAGUCUCA-5'

spiR-360432; 12082; CDS; -130; 100; 25  
5' -AACCUUACAAGCUAUAGCCUCAGAG-3'  
|||||  
3' -UUGGAAUGUUCGAUAUCGGAGUCUC-5'

spiR-392668; 12078; CDS; -138; 100; 26  
5' -GGGCAACCUUACAAGCUAUAGCCUCA-3'  
|||||  
3' -CCCGUUGGAAUGUUCGAUAUCGGAGU-5'

spiR-396601; 12081; CDS; -140; 100; 27  
5' -CAACCUUACAAGCUAUAGCCUCAGAGU-3'  
|||||  
3' -GUUGGAAUGUUCGAUAUCGGAGUCUCA-5'

spiR-401969; 12078; CDS; -138; 100; 26  
 5' -GGGCAACCUUACAAGCUAUAGCCUCA-3'  
 ||||||||||||||||||  
 3' -CCCGUUGGAAUGUUCGAUAUCGGAGU-5'  
 spiR-403725; 12079; CDS; -127; 100; 24  
 5' -GGCAACCUUACAAGCUAUAGCCUC-3'  
 ||||||||||||||||||  
 3' -CCGUUGGAAUGUUCGAUAUCGGAG-5'  
 spiR-403862; 12078; CDS; -134; 100; 25  
 5' -GGGCAACCUUACAAGCUAUAGCCUC-3'  
 ||||||||||||||||||  
 3' -CCCGUUGGAAUGUUCGAUAUCGGAG-5'  
 spiR-404008; 12079; CDS; -132; 100; 25  
 5' -GGCAACCUUACAAGCUAUAGCCUCA-3'  
 ||||||||||||||||||  
 3' -CCGUUGGAAUGUUCGAUAUCGGAGU-5'  
 spiR-404056; 12077; CDS; -142; 100; 27  
 5' -AGGGCAACCUUACAAGCUAUAGCCUCA-3'  
 ||||||||||||||||||  
 3' -UCCCGUUGGAAUGUUCGAUAUCGGAGU-5'  
 spiR-405339; 12079; CDS; -132; 100; 25  
 5' -GGCAACCUUACAAGCUAUAGCCUCA-3'  
 ||||||||||||||||||  
 3' -CCGUUGGAAUGUUCGAUAUCGGAGU-5'  
 spiR-405683; 12079; CDS; -127; 100; 24  
 5' -GGCAACCUUACAAGCUAUAGCCUC-3'  
 ||||||||||||||||||  
 3' -CCGUUGGAAUGUUCGAUAUCGGAG-5'  
 spiR-406209; 12078; CDS; -138; 100; 26  
 5' -GGGCAACCUUACAAGCUAUAGCCUCA-3'  
 ||||||||||||||||||  
 3' -CCCGUUGGAAUGUUCGAUAUCGGAGU-5'  
 spiR-406508; 12078; CDS; -127; 100; 24  
 5' -GGGCAACCUUACAAGCUAUAGCCU-3'  
 ||||||||||||||||||  
 3' -CCCGUUGGAAUGUUCGAUAUCGGA-5'  
 spiR-406684; 12079; CDS; -132; 100; 25  
 5' -GGCAACCUUACAAGCUAUAGCCUCA-3'  
 ||||||||||||||||||  
 3' -CCGUUGGAAUGUUCGAUAUCGGAGU-5'  
 spiR-410103; 12078; CDS; -138; 100; 26  
 5' -GGGCAACCUUACAAGCUAUAGCCUCA-3'  
 ||||||||||||||||||  
 3' -CCCGUUGGAAUGUUCGAUAUCGGAGU-5'  
 spiR-1177268; 12082; CDS; -130; 100; 25  
 5' -AACCUUACAAGCUAUAGCCUCAGAG-3'  
 ||||||||||||||||||  
 3' -UUGGAAUGUUCGAUAUCGGAGUCUC-5'
