# Supplementary material for: In Silico Study of piRNA Interactions with the SARS-CoV-2 Genome
Source: MDPI journal article supplement (doi:10.3390/ijms23179919), 2022-08-31
Supplement: s1 [file s1]

Table S1. The characteristics of the interaction of 70 piRNA and spiRNA BSs cluster in CDS gRNA of SARS-CoV-2 from 7175 nt to 7202 nt, 28 nt long

| piRNA      | Start of BS, nt | $\Delta G$ , kJ/mol | $\Delta G/\Delta G_m$ , % | Length, nt | $\Delta G^*$ , kJ/mol |
|------------|-----------------|---------------------|---------------------------|------------|-----------------------|
| piR-134104 | 7176            | -102                | 80                        | 26         | -128                  |
| piR-136315 | 7176            | -102                | 80                        | 26         | -128                  |
| piR-140212 | 7178            | -93                 | 80                        | 24         | -116                  |
| piR-146606 | 7178            | -100                | 84                        | 24         | -119                  |
| piR-151338 | 7179            | -96                 | 80                        | 24         | -120                  |
| piR-152752 | 7177            | -100                | 81                        | 25         | -124                  |
| piR-156867 | 7178            | -93                 | 80                        | 24         | -116                  |
| piR-158266 | 7178            | -98                 | 82                        | 24         | -120                  |
| piR-161744 | 7178            | -96                 | 80                        | 24         | -120                  |
| piR-170126 | 7178            | -102                | 80                        | 25         | -128                  |
| piR-172551 | 7176            | -102                | 80                        | 26         | -128                  |
| piR-172553 | 7176            | -106                | 81                        | 26         | -131                  |
| piR-174280 | 7177            | -102                | 80                        | 25         | -128                  |
| piR-175524 | 7177            | -106                | 85                        | 25         | -125                  |
| piR-175963 | 7177            | -100                | 81                        | 24         | -124                  |
| piR-177814 | 7176            | -104                | 80                        | 26         | -130                  |
| piR-178110 | 7178            | -98                 | 81                        | 24         | -121                  |
| piR-178851 | 7178            | -98                 | 81                        | 24         | -121                  |
| piR-179510 | 7177            | -102                | 81                        | 25         | -126                  |
| piR-179669 | 7177            | -102                | 80                        | 25         | -128                  |
| piR-179999 | 7178            | -96                 | 80                        | 24         | -120                  |
| piR-180563 | 7177            | -104                | 83                        | 25         | -125                  |
| piR-181322 | 7177            | -100                | 81                        | 25         | -124                  |
| piR-182676 | 7176            | -104                | 80                        | 26         | -130                  |
| piR-183206 | 7177            | -102                | 83                        | 25         | -123                  |
| piR-184425 | 7178            | -98                 | 81                        | 24         | -121                  |
| piR-184542 | 7176            | -108                | 84                        | 26         | -129                  |
| piR-184841 | 7177            | -104                | 84                        | 25         | -124                  |
| piR-185870 | 7178            | -100                | 81                        | 24         | -124                  |
| piR-186021 | 7177            | -102                | 80                        | 25         | -128                  |
| piR-186087 | 7176            | -104                | 82                        | 26         | -127                  |
| piR-186642 | 7178            | -96                 | 80                        | 24         | -120                  |
| piR-187824 | 7177            | -102                | 80                        | 25         | -128                  |
| piR-188562 | 7177            | -102                | 81                        | 25         | -186                  |
| piR-188611 | 7176            | -102                | 80                        | 26         | -128                  |
| piR-188777 | 7177            | -104                | 82                        | 25         | -127                  |
| piR-189382 | 7177            | -102                | 81                        | 26         | -126                  |
| piR-189757 | 7176            | -104                | 82                        | 26         | -127                  |
| piR-189772 | 7177            | -102                | 81                        | 25         | -126                  |
| piR-190320 | 7176            | -104                | 80                        | 26         | -130                  |
| piR-190595 | 7176            | -106                | 81                        | 26         | -131                  |
| piR-190864 | 7177            | -102                | 80                        | 25         | -128                  |
| piR-190896 | 7175            | -104                | 80                        | 26         | -130                  |
| piR-191349 | 7176            | -108                | 85                        | 25         | -127                  |
| piR-191639 | 7176            | -102                | 80                        | 26         | -128                  |
| piR-193077 | 7177            | -102                | 80                        | 25         | -128                  |
| piR-193433 | 7176            | -106                | 83                        | 26         | -128                  |
| piR-193777 | 7177            | -104                | 82                        | 25         | -127                  |
| piR-193805 | 7177            | -100                | 81                        | 25         | -124                  |
| piR-194123 | 7176            | -104                | 80                        | 26         | -130                  |
| piR-194172 | 7177            | -102                | 80                        | 25         | -128                  |
| piR-194321 | 7175            | -104                | 80                        | 27         | -130                  |
| piR-194842 | 7176            | -102                | 80                        | 26         | -128                  |
| piR-382458 | 7176            | -106                | 81                        | 26         | -131                  |
| piR-383400 | 7176            | -106                | 81                        | 26         | -131                  |

|                                                                                       |      |      |    |    |      |
|---------------------------------------------------------------------------------------|------|------|----|----|------|
| piR-384721                                                                            | 7177 | -98  | 81 | 25 | -121 |
| piR-390277                                                                            | 7178 | -98  | 82 | 24 | -120 |
| piR-394136                                                                            | 7177 | -98  | 81 | 25 | -121 |
| piR-394484                                                                            | 7176 | -108 | 82 | 26 | -132 |
| piR-399512                                                                            | 7177 | -98  | 82 | 24 | -120 |
| piR-402116                                                                            | 7176 | -104 | 82 | 26 | -127 |
| piR-402789                                                                            | 7176 | -106 | 81 | 26 | -131 |
| piR-403633                                                                            | 7176 | -110 | 85 | 26 | -130 |
| piR-403847                                                                            | 7176 | -106 | 82 | 26 | -129 |
| piR-403884                                                                            | 7176 | -108 | 82 | 26 | -132 |
| piR-404198                                                                            | 7175 | -108 | 82 | 27 | -132 |
| piR-404909                                                                            | 7176 | -102 | 81 | 26 | -126 |
| piR-409985                                                                            | 7176 | -106 | 82 | 26 | -129 |
| piR-410131                                                                            | 7176 | -104 | 80 | 26 | -130 |
| piR-2498460                                                                           | 7178 | -98  | 81 | 25 | -121 |
| Note. $\Delta G^*$ is $\Delta G$ for spiRNA with $\Delta G/\Delta G_m$ equal to 100%. |      |      |    |    |      |
