# Supplementary material for: In Silico Study of piRNA Interactions with the SARS-CoV-2 Genome
Source: MDPI journal article supplement (doi:10.3390/ijms23179919), 2022-08-31
Supplement: s1 [file s1]

Figure S2. The schemes of 12 piRNAs and spiRNAs interaction with CDS gRNA SARS-CoV-2 from 4670 nt to 29475 nt

piRNA or spiRNA; BS, nt; Region;  $\Delta G$ , kJ/mol;  $\Delta G/\Delta G_m$ , %; piRNA length, nt

piR-2047904; 4670; CDS; -136; 81; 32

```
5' -CUCAAAGUGCCAGCUACAGUUUCUGUUUCUUC-3'
    | | | | | | | | | | | | | | | | | | | |
3' -AUGCCUCAAGGUCGUUGUCUAAGACGAAGAAG-5'
```

spiR-2047904; 4670; CDS; -168; 100; 32

```
5' -CUCAAAGUGCCAGCUACAGUUUCUGUUUCUUC-3'
    | | | | | | | | | | | | | | | | | | | |
3' -GAGUUUCACGGUCGAUGUCAAGACAAAGAAG-5'
```

piR-912075; 9102; CDS; -140; 80; 33

```
5' -AAAGUUUACGCCUGACACACGUUAUGUGCUCA-3'
    | | | | | | | | | | | | | | | | | | | |
3' -UUACAAGUGAGGGACCGUGUAUCAUCCACGAGU-5'
```

spiR-912075; 9102; CDS; -175; 100; 33

```
5' -AAAGUUUACGCCUGACACACGUUAUGUGCUCA-3'
    | | | | | | | | | | | | | | | | | | | |
3' -UUUCAAUAGCGGGACUGUGUGCAAUACACGAGU-5'
```

piR-2352720, 9123; CDS; -138; 81; 34

```
5' -GUUAUGUGCUCAUGGAUGGCUCUAUUUUCAAUU-3'
    | | | | | | | | | | | | | | | | | | | |
3' -CGAUCCACGAGCAUUUACCCUGAUAAUAAUUA-5'
```

spiR-2352720, 9123; CDS; -170; 100; 34

```
5' -GUUAUGUGCUCAUGGAUGGCUCUAUUUUCAAUU-3'
    | | | | | | | | | | | | | | | | | | | |
3' -CAAUACACGAGUACUUACCGAGAUAAUAAGUUA-5'
```

piR-2490582; 10012; CDS; -142; 83; 33

```
5' -UUACCAACCACCACAAACCUCUAUACCUCAGC-3'
    | | | | | | | | | | | | | | | | | | | |
3' -AAAGGUGGUGGUGGUUGAAGUAAAGGAAUCG-5'
```

spiR-2490582; 10012; CDS; -171; 100; 33

```
5' -UUACCAACCACCACAAACCUCUAUACCUCAGC-3'
    | | | | | | | | | | | | | | | | | | | |
3' -AAUGGUUGGUGGUGUUUGGAGAUAGUGGAGUCG-5'
```

piR-1491787; 17115; CDS; -138; 80; 32

```
5' -UGGCCUAGCUCUCUACUACCCUUCUGCUCGCA-3'
    | | | | | | | | | | | | | | | | | | | |
3' -ACUGGAUCGAGUGACGAAGGGUAGAGGACUGU-5'
```

spiR-1491787; 17115; CDS; -173; 100; 32

```
5' -UGGCCUAGCUCUCUACUACCCUUCUGCUCGCA-3'
    | | | | | | | | | | | | | | | | | | | |
3' -ACCGGAUCGAGAGAUGAUGGGAAGACGAGCGU-5'
```

piR-3555322; 21712; CDS; -136; 82; 34

```
5' -AACUCAGGACUUGUUCUUAACCUUUCUUUCCAAU-3'
    | | | | | | | | | | | | | | | | | | | |
3' -UUGAGUUUUGAAAGAGAGUAGAAAGGUAAAGUUA-5'
```

spiR-3555322; 21712; CDS; -166; 100; 34

```
5' -AACUCAGGACUUGUUCUUAACCUUUCUUUCCAAU-3'
    | | | | | | | | | | | | | | | | | | | |
3' -UUGAGUCCUGAACAAGAAUGGAAAGAAAAGGUUA-5'
```

[illegible]
